# Supplementary material for: The Salmonella Effector SseK3 Targets Small Rab GTPases
Source: Front Cell Infect Microbiol. 2020 Aug 19;10:419. doi: 10.3389/fcimb.2020.00419 (PMC7466453; doi:10.3389/fcimb.2020.00419)
Supplement: Supplementary file 4 [file Table_3.xlsx]

## Sheet: Enrichment_analysis_20170418
Supplementary Table 3. Enrichment analysis of Arginine-GlcNAc modified peptides. Proteins observed to be Arginine-GlcNAcylated were assessed for enrichment of GOBP, GOMF GOCC and TFEB associated proteins using the Perseus platform against all other peptides identified in the analysis.
Selection column	Selection value	Category column	Category value	Total size	Selection size	Category size	Intersection size	Enrichment factor	P value	Benj. Hoch. FDR
Modifications	Arg_GlcNAc	KEGG name	Cytokine-cytokine receptor interaction	10520	50	28	8	60.114	4.1507e-13	6.1513e-10
Modifications	Arg_GlcNAc	KEGG name	Apoptosis	10520	50	37	8	45.492	4.973e-12	2.4566e-09
Modifications	Arg_GlcNAc	GOBP name	Golgi vesicle transport	10520	50	120	10	17.533	1.7168e-10	5.7572e-06
Modifications	Arg_GlcNAc	GOBP name	ER to Golgi vesicle-mediated transport	10520	50	58	8	29.021	2.2692e-10	3.8047e-06
Modifications	Arg_GlcNAc	GOCC name	Golgi apparatus part	10520	50	324	13	8.442	2.0634e-09	1.7621e-06
Modifications	Arg_GlcNAc	GOCC name	integral to membrane	10520	50	1295	23	3.7368	3.2952e-09	2.1105e-06
Modifications	Arg_GlcNAc	GOCC name	intrinsic to membrane	10520	50	1308	23	3.6997	3.9989e-09	2.2767e-06
Modifications	Arg_GlcNAc	GOMF name	transmembrane signaling receptor activity	10520	50	66	7	22.315	2.1617e-08	4.7601e-05
Modifications	Arg_GlcNAc	GOCC name	Golgi membrane	10520	50	198	10	10.626	2.2159e-08	8.7342e-06
Modifications	Arg_GlcNAc	GOMF name	signaling receptor activity	10520	50	77	7	19.127	6.379e-08	0.00011237
Modifications	Arg_GlcNAc	GOBP name	retrograde transport, endosome to Golgi	10520	50	10	4	84.16	9.236e-08	0.00038715
Modifications	Arg_GlcNAc	GOBP name	vesicle-mediated transport	10520	50	453	13	6.038	1.0771e-07	0.0003612
Modifications	Arg_GlcNAc	KEGG name	SNARE interactions in vesicular transport	10520	50	28	5	37.571	1.7586e-07	1.8616e-05
Modifications	Arg_GlcNAc	GOCC name	cis-Golgi network	10520	50	30	5	35.067	2.5282e-07	4.9825e-05
Modifications	Arg_GlcNAc	GOBP name	small GTPase mediated signal transduction	10520	50	223	9	8.4915	7.9247e-07	0.0018982
Modifications	Arg_GlcNAc	GOBP name	intracellular signal transduction	10520	50	541	13	5.0558	8.046e-07	0.0017988
Modifications	Arg_GlcNAc	GOMF name	signal transducer activity	10520	50	176	8	9.5636	1.4271e-06	0.0013967
Modifications	Arg_GlcNAc	GOMF name	molecular transducer activity	10520	50	176	8	9.5636	1.4271e-06	0.0015713
Modifications	Arg_GlcNAc	GOMF name	tumor necrosis factor receptor activity	10520	50	6	3	105.2	1.9938e-06	0.0013509
Modifications	Arg_GlcNAc	GOMF name	tumor necrosis factor binding	10520	50	6	3	105.2	1.9938e-06	0.0014634
Modifications	Arg_GlcNAc	GOMF name	death receptor activity	10520	50	6	3	105.2	1.9938e-06	0.0015965
Modifications	Arg_GlcNAc	GOMF name	receptor activity	10520	50	196	8	8.5878	3.1644e-06	0.0019908
Modifications	Arg_GlcNAc	GOBP name	positive regulation of tumor necrosis factor production	10520	50	24	4	35.067	4.3949e-06	0.0040938
Modifications	Arg_GlcNAc	GOBP name	regulation of tumor necrosis factor production	10520	50	33	4	25.503	1.6268e-05	0.010697
